# Supplementary material for: Biomimetic mineralization of zein/calcium phosphate nanocomposite nanofibrous mats for bone tissue scaffolds
Source: Royal Society of Chemistry journal article supplement (doi:10.1039/c4ce01287a), 2014-08-21
Supplement: c4ce01287a1.pdf [file c4ce01287a1.pdf]

Cite this: DOI: 10.1039/c0xx00000x

www.rsc.org/xxxxxx

ARTICLE TYPE

## Supplementary Information

### Biomimetic Mineralization of Zein/Calcium Phosphate Nanocomposite Nanofibrous Mats for Bone Tissue Scaffold

5 Cai-Yun Zhang<sup>1, 2†</sup>, Wei Zhang<sup>2†</sup>, Li-Bo Mao<sup>1</sup>, Yu Zhao<sup>3</sup>, Shu-Hong Yu<sup>1\*</sup>

Received (in XXX, XXX) Xth XXXXXXXXXX 20XX, Accepted Xth XXXXXXXXXX 20XX

DOI: 10.1039/b000000x

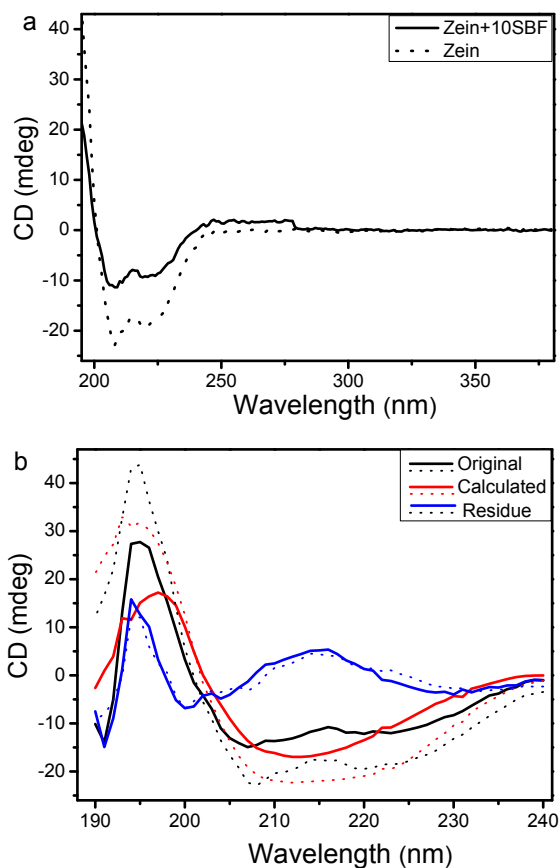

10

**Figure S1.** (a) CD spectra of 1mg/mL zein solution before (dot line) and after (solid line) interacted with 10 SBF and (b) their simulation results with JWS program.
